# Supplementary material for: A dual-emission fluorescence sensor based on TCPP@UiO-66-NH2 for high-sensitivity detection of copper ions
Source: Royal Society of Chemistry journal article supplement (doi:10.1039/d4ce01017e), 2024-12-13
Supplement: d4ce01017e1.pdf [file d4ce01017e1.pdf]

## Supporting information

### **A Dual-Emission Fluorescence Sensor Based on TCPP@UiO-66-NH<sub>2</sub> for High-Sensitivity Detection of Copper Ions**

Jia-qi Du,<sup>a</sup> Du-wei Lin,<sup>a</sup> Wen-yi Chen,<sup>a</sup> Qian Sun\*<sup>a</sup>, En-qing Gao<sup>b</sup>

<sup>a</sup> School of Chemistry and Molecular Engineering, East China Normal University, Shanghai 200241, P. R. China, E-mail: xsun@chem.ecnu.edu.cn

<sup>b</sup> Shanghai Key Laboratory of Green Chemistry and Chemical Processes, School of Chemistry and Molecular Engineering, East China Normal University, Shanghai 200062, P. R. China.

#### **Contents**

S1 The prepared samples (Left: UiO-66-NH<sub>2</sub>, Right: TCPP@UiO-66-NH<sub>2</sub>) and their suspension liquids before and after TCPP doping. (photographs taken under UV-lamp, excited at 360 nm)

S2 XRD patterns of the (a) series TCPP@UiO-66-NH<sub>2</sub> and standard PCN-222. (b) Series TCPP@UiO-66-NH<sub>2</sub> fluorescence emission spectra and photographs ( $\lambda_{\text{ex}} = 300$  nm).

S3 TGA image of UiO-66-NH<sub>2</sub> and TCPP@UiO-66-NH<sub>2</sub> (in air).

S4 The N<sub>2</sub> adsorption-desorption isotherm (a) and the pore size distribution (b) of UiO-66-NH<sub>2</sub> and TCPP@UiO-66-NH<sub>2</sub>.

S5 (a) The XRD of TCPP@UiO-66-NH<sub>2</sub> before and after application. (b) Line chart of I<sub>466</sub>/I<sub>654</sub> ratio changes in TCPP@UiO-66-NH<sub>2</sub> probe solution during 7 days. (c) Line chart of I<sub>466</sub>/I<sub>654</sub> ratio changes cycled four times TCPP@UiO-66-NH<sub>2</sub>.

Table S1 Statistical data on the linear response range and detection limit of Cu<sup>2+</sup> based on fluorescent MOFs probes.

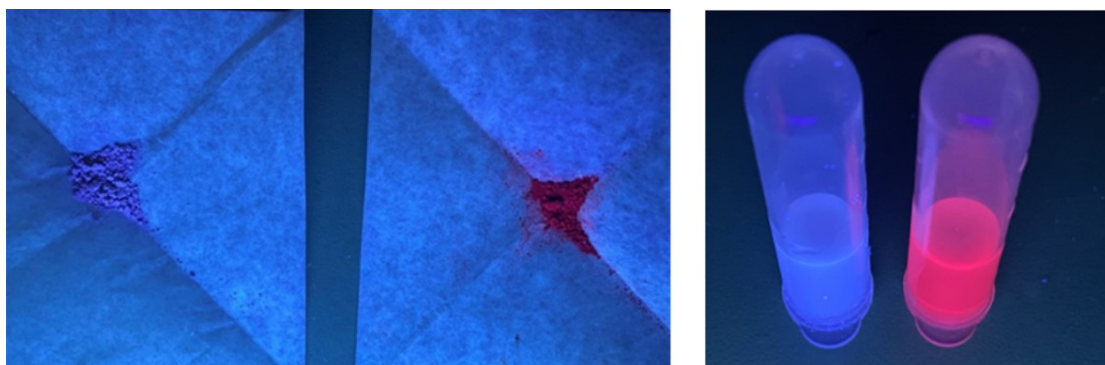

**Fig. S1.** The prepared samples (Left: UiO-66-NH<sub>2</sub>, Right: TCPP@UiO-66-NH<sub>2</sub>) and their suspension liquids before and after TCPP doping. (photographs taken under UV-lamp, excited at 360 nm)

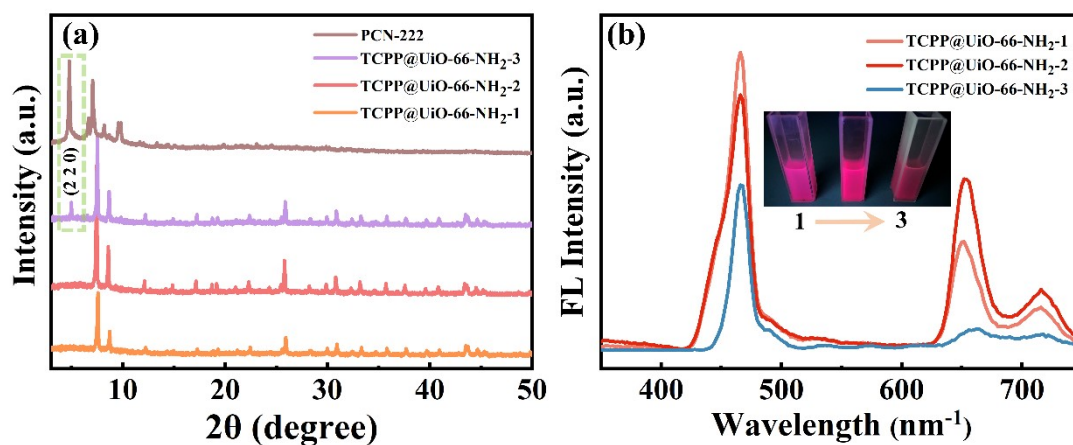

**Fig. S2.** XRD patterns of the (a) series TCPP@UiO-66-NH<sub>2</sub> and standard PCN-222. (b) Series TCPP@UiO-66-NH<sub>2</sub> fluorescence emission spectra and photographs ( $\lambda_{\text{ex}} = 300 \text{ nm}$ ).

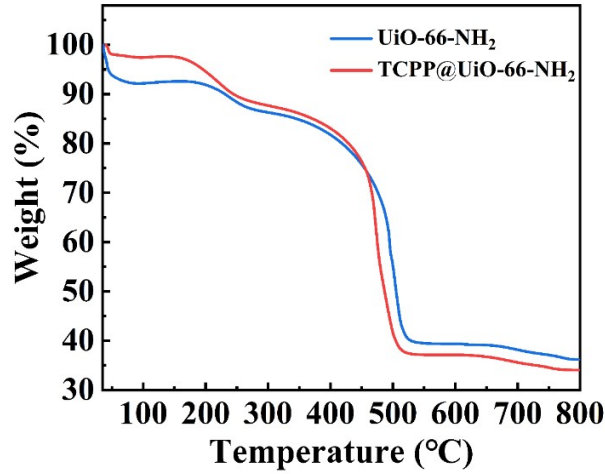

Fig. S3. TGA image of UiO-66-NH<sub>2</sub> and TCPP@UiO-66-NH<sub>2</sub> (in air).

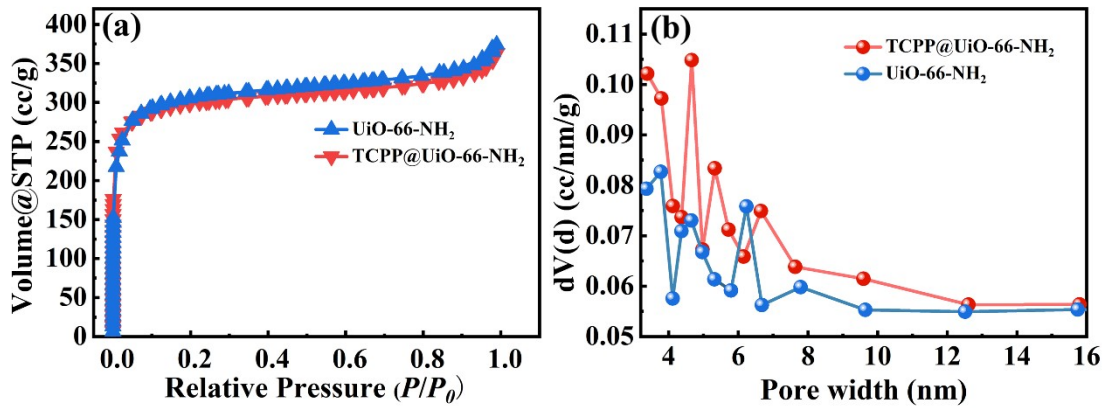

Fig. S4. The N<sub>2</sub> adsorption-desorption isotherm (a) and the pore size distribution (b) of UiO-66-NH<sub>2</sub> and TCPP@UiO-66-NH<sub>2</sub>.

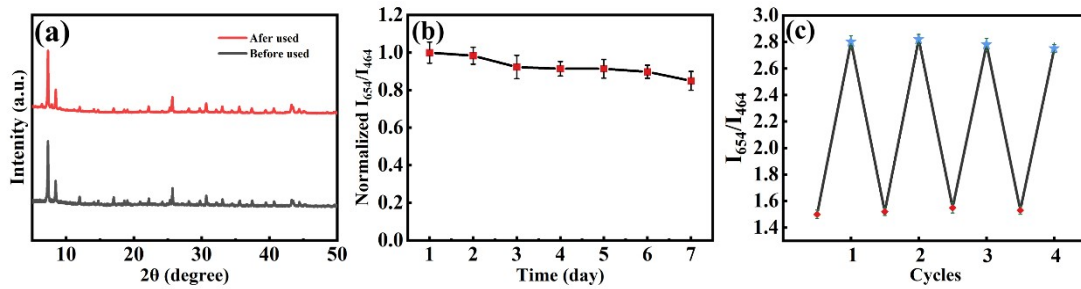

Fig. S5. (a) The XRD of TCPP@UiO-66-NH<sub>2</sub> before and after application. (b) Line chart of I<sub>466</sub>/I<sub>654</sub> ratio changes in TCPP@UiO-66-NH<sub>2</sub> probe solution during 7 days. (c) Line chart of I<sub>466</sub>/I<sub>654</sub> ratio changes cycled four times TCPP@UiO-66-NH<sub>2</sub>.

**Table S1** Statistical data on the linear response range and detection limit of Cu<sup>2+</sup> based on fluorescent MOFs probes.

| MOF                                                           | Linear range<br>( $\mu\text{M}$ ) | LOD                 | Ref.      |
|---------------------------------------------------------------|-----------------------------------|---------------------|-----------|
| PCN-222-Pd(II)                                                | 0-2                               | 50 nM               | 1         |
| MIL-53-L                                                      | 0-400                             | 10 $\mu\text{M}$    | 2         |
| $\{[\text{Nd}_2(\text{NH}_2\text{-BDC})_3(\text{DMF})_4]\}_n$ | 0-10 <sup>4</sup>                 | 24.95 $\mu\text{M}$ | 3         |
| Cd-MOF-74                                                     | 0-5950                            | 0.037 mM            | 4         |
| MOF-525                                                       | 0-20                              | 67 nM               | 5         |
| Eu <sup>3+</sup> @CAU-11                                      | 50-10 <sup>4</sup>                | 6.2 $\mu\text{M}$   | 6         |
| CDs-PCN-224                                                   | 0-10                              | 44 nM               | 7         |
| TCPP@UiO-66-NH <sub>2</sub>                                   | 0-10                              | 24 nM               | This work |

## References

1. Y.-Z. Chen and H.-L. Jiang, *Chemistry of Materials*, 2016, **28**, 6698-6704.
2. C. Liu and B. Yan, *Sensors and Actuators B-Chemical*, 2016, **235**, 541-546.
3. J. Luo, B. S. Liu, C. Cao and F. Wei, *Inorganic Chemistry Communications*, 2017, **76**, 18-21.
4. T.-T. Zheng, J. Zhao, Z.-W. Fang, M.-T. Li, C.-Y. Sun, X. Li, X.-L. Wang and Z.-M. Su, *Dalton Transactions*, 2017, **46**, 2456-2461.
5. L. Li, S. Shen, R. Lin, Y. Bai and H. Liu, *Chemical Communications*, 2017, **53**, 9986-9989.
6. Y. Zhang and B. Yan, *Talanta*, 2019, **197**, 291-298.
7. W. Zhou, Z. Hu, J. Wei, H. Lu, H. Dai, J. Zhao, W. Zhang and R. Guo, *Composites Communications*, 2022, **33**.
